# Supplementary material for: Proteomic Analysis of Chinook Salmon (Oncorhynchus tshawytscha) Ovarian Fluid
Source: PLoS One. 2014 Aug 4;9(8):e104155. doi: 10.1371/journal.pone.0104155 (PMC4121310; doi:10.1371/journal.pone.0104155)
Supplement: Table S1 — Non-redundant list of significant protein identifications. Accession number (Accession) and description (protein group) from the Teleostei amino acid sequence database (Db: aa) or the est sequence database (Db: est). The number of different peptides (identified peptides) and the number of spectra acquired and identified per protein (Peptide spectrum match) as well as the average peak area of the three strongest peptide hits per protein (Area under the curve) can be used as a rough estimation of relative abundance. The total protein score is given for each search engine (SEQUEST, Amanda and Mascot protein score). Note the est database was only searched with Mascot and there is no area under the curve calculation available for this search. The molecular weight (MW) and isoelectric point (pI) of identified proteins have been calculated based on the amino acid sequence database entry. EST entries were not considered for MW and pI calculation. (XLSX) [file pone.0104155.s001.xlsx]

## Sheet: Sheet1
Table S1: Non-redundant list of significant protein identifications. Accession number (Accession) and description (protein group) from the Teleostei amino acid sequence database (Db: aa) or the est sequence database (Db: est). The number of different peptides (identified peptides) and the number of spectra acquired and identified per protein (Peptide spectrum match) as well as the average peak ar…
Accession	Db	Protein group	Identified peptides	Peptide spectrum match	Area under the curve	SEQUEST protein score	Amanda protein score	Mascot protein score	calculated MW	calculated pI
3123011	aa	RecName: Full=Vitellogenin; Short=VTG; Contains: RecName: Full=Lipovitellin I; Short=LVI; Contains: RecName: Full=Phosvitin; Short=PV; Contains: RecName: Full=Lipovitellin II; Short=LVII; Flags: Precursor	89	4305	5.66813e+09	5674.97	207539	42233.6	183.012	8.93896
391353202	aa	vitellogenin [Salvelinus leucomaenis]	38	2367	4.15487e+09	3241.03	119557	25227.6	181.241	8.67529
29150218	aa	vitellogenin A [Oncorhynchus tshawytscha]	19	1012	2.72442e+09	1225.18	44276	8738.67	29.8467	8.20654
9246816	aa	transferrin [Oncorhynchus tshawytscha]	50	724	8.9715e+08	920.268	31374.3	6678.83	73.8924	6.26514
185132771	aa	apolipoprotein A-I-1 precursor [Oncorhynchus mykiss]	31	599	2.12908e+09	705.239	23150.6	5493.95	29.6856	5.37646
57121596	est	ssalrgb519019_rev_0 mixed_tissue Salmo salar cDNA, mRNA sequence	9	504				11784.3
1703722	aa	vitellogenin [Oncorhynchus mykiss]	15	367	1.39078e+09	430.541	16338	3690.8	44.7745	9.51025
225704384	aa	Hemoglobin subunit beta-4 [Oncorhynchus mykiss]	14	256	1.10477e+09	298.285	10862.8	2374.99	16.1333	7.10791
62241078	aa	vitellogenin [Verasper moseri]	14	246	8.8285e+08	322.213	12770.3	2622.4	177.724	8.83643
225703790	aa	Hemoglobin subunit beta-1 [Oncorhynchus mykiss]	10	203	4.93614e+08	232.836	7343.9	1894.62	15.9193	9.01221
122515	aa	RecName: Full=Hemoglobin subunit beta-1; AltName: Full=Beta-1-globin; AltName: Full=Hemoglobin beta-1 chain; AltName: Full=Hemoglobin beta-I chain	11	194	4.47702e+08	212.708	7159.79	1745.1	15.8713	9.23193
185132509; 113581	aa	serum albumin 1 precursor [Salmo salar]	20	193	5.48227e+08	211.214	9390.16	1911.68	67.1066	5.71924
185132174	aa	alpha-1-antiproteinase-like protein precursor [Oncorhynchus mykiss]	15	182	2.64684e+08	261.975	7491.61	1957.66	47.4984	6.34131
219689036	aa	vitellogenin [Oncorhynchus keta]	13	161	1.43614e+08	158.651	6011.07	890.291	21.7436	6.29053
24669602	est	636460 NCCCWA 1RT Oncorhynchus mykiss cDNA clone 1RT119G19_A_D10 5', mRNA sequence	23	159				2761.75
224613330	aa	Fibronectin [Salmo salar]	18	140	8.81977e+07	178.514	5830.68	1157.5	71.8336	6.65381
149850246	aa	vitellogenin A [Mugil cephalus]	8	139	7.56868e+08	159.422	5807.47	1300.41	185.693	9.05615
295419235	aa	serum albumin 1 protein [Oncorhynchus mykiss]	12	124	6.14815e+08	163.196	6675.49	1664.36	30.7291	7.25439
374463510	aa	beta-actin [Onychostoma macrolepis]	9	111	2.60868e+08	142.698	4500.53	991.28	41.6687	5.57959
391353196	aa	vitellogenin A [Gadus chalcogrammus]	5	97	4.33481e+08	93.8263	2775.03	459.048	182.33	8.95361
185132822	aa	apolipoprotein A-I-2 precursor [Oncorhynchus mykiss]	15	89	4.91355e+08	85.2129	2969.59	506.628	29.6615	5.13525
213512936	aa	Apolipoprotein A-I precursor [Salmo salar]	14	82	5.29842e+08	65.6356	2199.91	566.519	29.6655	5.21143
185134024	aa	alpha-globin I [Oncorhynchus mykiss]	6	80	2.46681e+08	83.4708	2480.93	596.619	15.9104	8.6167
47118110	aa	vitellogenin 2, partial [Salvelinus alpinus]	11	76	3.38679e+08	77.9389	1970.99	347.927	64.939	8.71924
57115411	est	ccluwtbl013027_0 Coregonus clupeaformis head Coregonus clupeaformis cDNA, mRNA sequence	10	76				1438.49
125612869	est	EST_otsh_rgd_3800 otshrgd mixed_tissue Oncorhynchus tshawytscha cDNA Oncorhynchus tshawytscha cDNA clone otsh_rgd_007_134_rev 5', mRNA sequence	11	76				1664.85
212420009	aa	sex hormone-binding globulin alpha [Oncorhynchus tshawytscha]	13	74	1.23783e+08	103.866	3024.37	715.377	43.5222	4.93213
111551870	est	CU065574 AGENAE Rainbow trout normalized testis library (tcbi) Oncorhynchus mykiss cDNA clone tcbi0052.k.12 5', mRNA sequence	11	73				1515.9
223561950	est	EST_ssal_rgg_1095769 ssalrgg mixed_tissue full-length Salmo salar cDNA Salmo salar cDNA clone ssal_rgg_507_121 3', mRNA sequence	9	63				1392.46
29296422	est	otshchml007037 Oncorhynchus tshawytscha mixed_tissue Oncorhynchus tshawytscha cDNA, mRNA sequence	11	62				847.874
58428938	aa	beta-actin, partial [Siniperca chuatsi]	4	56	1.49325e+08	67.8988	2644.2	621.647	19.6669	5.38916
431608	aa	complement component C3, partial [Oncorhynchus mykiss]	12	56	8.40941e+07	63.076	2344.93	653.72	179.93	6.53662
158132196	aa	choriogenin L [Oncorhynchus masou]	7	56	7.17307e+07	65.9652	2221.44	578.021	49.4356	7.13721
126016995	est	BX082237 AGENAE Rainbow trout normalized multi-tissues library (tcac) Oncorhynchus mykiss cDNA clone tcac0001.c.10 5prim, mRNA sequence	8	56				1301.81
311812832	aa	unnamed protein product [Danio rerio]	10	54	3.89738e+07	52.1089	1691.12	518.462	24.6617	10.9312
29307685	est	omykrbna504108 Oncorhynchus mykiss Chilliwack River steelhead whole Oncorhynchus mykiss cDNA, mRNA sequence	6	54				1264.59
223565303	est	EST_ssal_rgg_1102003 ssalrgg mixed_tissue full-length Salmo salar cDNA Salmo salar cDNA clone ssal_rgg_519_211 3', mRNA sequence	10	54				751.989
95931876	aa	serum albumin [Oncorhynchus mykiss]	9	51	2.36932e+08	44.0663	1967.05	329.161	18.716	5.2749
40548576	aa	zona pellucida protein gamma [Salvelinus alpinus]	6	45	7.17307e+07	50.9182	1971.29	453.065	41.3036	6.91748
1848139	aa	hemopexin-like protein [Oncorhynchus mykiss]	7	44	1.3046e+08	49.8647	1865.96	334.393	50.4221	6.03662
185133494	aa	simple type II keratin K8b (S2) [Oncorhynchus mykiss]	8	44	1.0705e+08	30.5671	1208.82	282.045	58.9398	5.21143
185135626	aa	complement component 4 precursor [Oncorhynchus mykiss]	8	44	4.29646e+07	61.5236	2275.84	463.875	192.471	6.68311
391353204	aa	phosvitinless vitellogenin [Salvelinus leucomaenis]	4	43	4.21776e+07	44.8754	2035.93	450.826	143.44	7.50342
755800	aa	unnamed protein product [Oncorhynchus mykiss]	8	42	5.43504e+07	52.5118	2119.49	496.244	61.0629	6.15088
90066848	est	BX884859 tcbk Oncorhynchus mykiss cDNA clone tcbk0032.b.13 5prim, mRNA sequence	9	42				436.741
185135469	aa	UPF0762 protein C6orf58 homolog precursor [Oncorhynchus mykiss]	5	41	1.07812e+08	51.9803	1447.81	477.714	39.9196	4.81787
223561965	est	EST_ssal_rgg_1097316 ssalrgg mixed_tissue full-length Salmo salar cDNA Salmo salar cDNA clone ssal_rgg_507_132 5', mRNA sequence	6	40				561.003
238231539	aa	mannan-binding lectin H2 precursor [Oncorhynchus mykiss]	6	39	1.56024e+08	49.2188	2014.81	534.348	25.767	5.32568
545757	aa	cystatin=cysteine proteinase inhibitor [Oncorhynchus keta=chum salmon, pituitary glands, Peptide, 111 aa]	4	37	2.32891e+07	45.5302	1531.71	456.001	12.4162	9.18799
24599841	est	626405 NCCCWA 1RT Oncorhynchus mykiss cDNA clone 1RT78L11_B_F06 5', mRNA sequence	11	37				965.458
125611818	est	EST_otsh_rgd_2749 otshrgd mixed_tissue Oncorhynchus tshawytscha cDNA Oncorhynchus tshawytscha cDNA clone otsh_rgd_005_214_rev 5', mRNA sequence	6	37				790.616
126016327	est	BX073092 AGENAE Rainbow trout multi-tissues library (tcaa) Oncorhynchus mykiss cDNA clone tcaa0001.e.04 5prim, mRNA sequence	8	36				982.777
151531453	est	EST_sfon_evi_749181 sfonevi mixed_tissue Salvelinus fontinalis cDNA Salvelinus fontinalis cDNA clone sfon_evi_506_189_rev 3', mRNA sequence	6	36				391.838
189528831	aa	PREDICTED: pregnancy zone protein [Danio rerio]	3	33	1.53768e+07	30.3078	951.522	223.864	160.558	7.45947
15845858	est	SS1-0369 Atlantic Salmon spleen Salmo salar cDNA clone SS1-0369 similar to Alpha hemoglobin (HbA), mRNA sequence	7	33				497.074
90051106	est	BX078755 AGENAE Rainbow trout normalized multi-tissues library (tcad) Oncorhynchus mykiss cDNA clone tcad0008.i.12 5prim, mRNA sequence	8	32				542.956
189227855	est	okis_FCE_L3-5.H02 Coho salmon ZAP Express ovarian library Oncorhynchus kisutch cDNA, mRNA sequence	7	32				405.099
151517448	est	EST_oner_rge_722569 onerrge mixed_tissue Oncorhynchus nerka cDNA Oncorhynchus nerka cDNA clone oner_rge_10_361_fwd 3', mRNA sequence	7	31				416.594
151531452	est	EST_sfon_evi_748797 sfonevi mixed_tissue Salvelinus fontinalis cDNA Salvelinus fontinalis cDNA clone sfon_evi_506_189_fwd 5', mRNA sequence	4	30				317.062
90173769	est	BX075649 AGENAE Rainbow trout normalized multi-tissues library (tcad) Oncorhynchus mykiss cDNA clone tcad0003.f.19 5prim, mRNA sequence	9	29				417.144
213511078	aa	Angiotensinogen precursor [Salmo salar]	5	27	2.97545e+07	28.3443	1203.14	260.89	51.7236	7.79639
56997141	est	1279890 NCCCWA 03RT Oncorhynchus mykiss cDNA clone 03RT110M07 3', mRNA sequence	9	27				423.374
125614187	est	EST_otsh_rgd_5118 otshrgd mixed_tissue Oncorhynchus tshawytscha cDNA Oncorhynchus tshawytscha cDNA clone otsh_rgd_009_263_rev 5', mRNA sequence	9	26				858.765
261348431	aa	zona pellucida/egg shell precursor C [Salmo salar]	3	25	5.57002e+07	30.5384	1108.89	253.927	15.3284	6.354
185135584	aa	coagulation factor II precursor [Oncorhynchus mykiss]	4	24	1.9651e+07	28.2818	1040.62	328.602	70.4876	6.72705
24677559	est	642515 NCCCWA 1RT Oncorhynchus mykiss cDNA clone 1RT35I13_A_E07 5', mRNA sequence	7	24				416.359
226922560	est	FP324577 Rainbow trout multi-tissues library (resequencing) (tccn) Oncorhynchus mykiss cDNA clone tcbk0078.b.19 5', mRNA sequence	4	24				750.833
157831849	aa	Chain A, The Refined Crystal Structure Of Lysozyme From The Rainbow Trout (Oncorhynchus Mykiss)	4	23	4.55548e+07	32.7884	1063.68	397.41	14.2779	8.11865
125609351	est	EST_otsh_rgd_282 otshrgd mixed_tissue Oncorhynchus tshawytscha cDNA Oncorhynchus tshawytscha cDNA clone otsh_rgd_001_179_rev 5', mRNA sequence	5	23				302.347
90120049	est	BX081120 AGENAE Rainbow trout normalized multi-tissues library (tcad) Oncorhynchus mykiss cDNA clone tcad0009.n.23 5prim, mRNA sequence	7	22				357.191
39645432	aa	Krt5 protein [Danio rerio]	6	21	5.21116e+07	14.1585	651.623	157.358	57.7923	5.33838
45319200	est	SGP161490 Atlantic salmon Liver cDNA library Salmo salar cDNA clone L4-1167 5', mRNA sequence	7	21				527.946
90066766	est	BX879531 tcbk Oncorhynchus mykiss cDNA clone tcbk0056.f.09 5prim, mRNA sequence	9	21				297.858
90168770	est	BX862207 tcba Oncorhynchus mykiss cDNA clone tcba0010.c.15 5prim, mRNA sequence	4	21				582.879
125568552	est	EST_otsh_evc_975 otshevc mixed_tissue Oncorhynchus tshawytscha cDNA Oncorhynchus tshawytscha cDNA clone otsh_evc_004_249_rev 5', mRNA sequence	5	21				605.754
116875789	aa	uncharacterized protein LOC768289 [Danio rerio]	3	20	4.97816e+07	21.4878	216.026	197.556	47.7292	6.55127
84208976	est	SGP303939 Atlantic salmon Gills II cDNA library Salmo salar cDNA clone SS0196A02 5', mRNA sequence	5	20				181.558
213081519	est	EST_ssal_rgf_863449 ssalrgf mixed_tissue full-length Salmo salar cDNA Salmo salar cDNA clone ssal_rgf_527_121 5', mRNA sequence	6	20				453.739
47230600	aa	unnamed protein product [Tetraodon nigroviridis]	3	19	2.73554e+07	20.2212	763.701	179.804	73.4745	6.22705
56979426	est	1347658 NCCCWA 10RT#3 Oncorhynchus mykiss cDNA clone 10RT#3_132E16 5', mRNA sequence	3	19				271.169
90149212	est	BX910375 tcbk Oncorhynchus mykiss cDNA clone tcbk0070.p.09 5prim, mRNA sequence	5	19				85.4056
213087199	est	EST_ssal_rgf_868854 ssalrgf mixed_tissue full-length Salmo salar cDNA Salmo salar cDNA clone ssal_rgf_539_150 5', mRNA sequence	7	19				274.792
185134733	aa	matrix metalloproteinase-9 precursor [Oncorhynchus mykiss]	3	18	2.72906e+07	24.9406	976.069	238.421	75.2129	5.92236
24665055	est	634673 NCCCWA 1RT Oncorhynchus mykiss cDNA clone 1RT67N18_D_G09 5', mRNA sequence	3	18				624.522
85051834	est	EST_ssal_rgb2_44431 rgb2 Salmo salar cDNA clone ssal_rgb2_571_374_rev 5', mRNA sequence	4	18				301.449
117822751	est	EST_ssal_evf_4402 ssalevf mixed_tissue Salmo salar cDNA Salmo salar cDNA clone ssal_evf_504_075_fwd 5', mRNA sequence	3	18				744.233
15280993	est	EST00522 Atlantic salmon Lambda Zap Express liver cDNA library Salmo salar cDNA clone LRR4-f01 5' similar to Unidentified, mRNA sequence	3	17				282.949
125607274	est	EST_otsh_evc_3934 otshevc mixed_tissue Oncorhynchus tshawytscha cDNA Oncorhynchus tshawytscha cDNA clone otsh_evc_010_051_fwd 3', mRNA sequence	7	17				512.585
213068890	est	EST_ssal_rgf_842916 ssalrgf mixed_tissue full-length Salmo salar cDNA Salmo salar cDNA clone ssal_rgf_516_132 5', mRNA sequence	5	17				217.331
224613492	aa	Fatty acyl-CoA hydrolase precursor, medium chain [Salmo salar]	3	16	5.9554e+07	13.5727	491.385	142.327	61.291	5.8208
51949771	aa	fibronectin 1b [Danio rerio]	3	16	2.80786e+07	15.3357	789.507	102.292	275.501	5.79541
125611469	est	EST_otsh_rgd_2400 otshrgd mixed_tissue Oncorhynchus tshawytscha cDNA Oncorhynchus tshawytscha cDNA clone otsh_rgd_004_361_rev 5', mRNA sequence	8	16				343.729
189229719	est	okis_GA0099.F09 Coho salmon ZAP Express ovarian library Oncorhynchus kisutch cDNA, mRNA sequence	5	16				415.32
223563942	est	EST_ssal_rgg_1025949 ssalrgg mixed_tissue full-length Salmo salar cDNA Salmo salar cDNA clone ssal_rgg_505_189 5', mRNA sequence	3	16				103.399
257799027	aa	hemoglobin beta 1 [Gadus morhua]	2	15	9.03097e+07	14.0025	344.75	82.0633	16.3624	7.79639
498949201	aa	PREDICTED: fibronectin-like isoform X2 [Maylandia zebra]	4	15	2.67006e+07	5.25149	330.199	103.24	257.022	5.93506
228069369	aa	ubiquitin [Oncorhynchus tshawytscha]	4	15	9.70367e+06	10.0574	677.926	122.16	7.55409	6.02393
164422325	aa	C1q-like adipose specific protein [Oncorhynchus masou formosanus]	3	14	5.99047e+07	20.1231	757.642	334.158	23.1987	5.59229
112254425	est	CU073620 AGENAE Rainbow trout multi-tissues library (tcce) Oncorhynchus mykiss cDNA clone tcbk0044.d.16 3', mRNA sequence	5	14				147.291
238231551	aa	decorin precursor [Oncorhynchus mykiss]	2	13	1.23172e+07	15.8743	592.789	140.19	40.3381	8.51416
85037725	est	EST_ssal_rgb2_30322 rgb2 Salmo salar cDNA clone ssal_rgb2_549_070_rev 5', mRNA sequence	3	13				242.189
125611502	est	EST_otsh_rgd_2433 otshrgd mixed_tissue Oncorhynchus tshawytscha cDNA Oncorhynchus tshawytscha cDNA clone otsh_rgd_004_382_rev 5', mRNA sequence	6	13				229.118
442565950	aa	immunoglobulin mu A2 heavy chain secreted form, partial [Salvelinus alpinus]	2	12	4.58048e+07	19.0993	707.171	125.766	49.8584	6.21436
185135614	aa	toxin-1 precursor [Oncorhynchus mykiss]	3	12	1.05904e+07	10.1341	452.754	97.35	8.79218	7.82568
52219192	aa	peptidyl-prolyl cis-trans isomerase FKBP2 precursor [Danio rerio]	2	12	6.39188e+06	13.9419	629.629	155.11	13.6784	9.5835
29296179	est	otshchml004066 Oncorhynchus tshawytscha mixed_tissue Oncorhynchus tshawytscha cDNA, mRNA sequence	3	12				85.6621
29316471	est	ssalplnb503242_rev gut Salmo salar cDNA, mRNA sequence	2	12				334.594
40541690	est	EST00874 Atlantic salmon Lambda Zap Express ovary cDNA library Salmo salar cDNA clone oyr_002_b03 5' similar to Alpha-2-microglobulin-1, BAA85038, mRNA sequence	3	12				277.774
90096634	est	BX865385 tcba Oncorhynchus mykiss cDNA clone tcba0023.n.03 5prim, mRNA sequence	4	12				352.094
112257477	est	CU071967 AGENAE Rainbow trout multi-tissues library (tcce) Oncorhynchus mykiss cDNA clone tcba0011.p.22 3', mRNA sequence	4	12				265.45
125614115	est	EST_otsh_rgd_5046 otshrgd mixed_tissue Oncorhynchus tshawytscha cDNA Oncorhynchus tshawytscha cDNA clone otsh_rgd_009_216_rev 5', mRNA sequence	5	12				285.519
185132376	aa	cathepsin D precursor [Oncorhynchus mykiss]	2	11	1.45592e+07	11.8497	330.51	91.2768	42.9454	5.92236
90066008	est	BX911362 tcbk Oncorhynchus mykiss cDNA clone tcbk0069.g.07 5prim, mRNA sequence	4	11				77.0751
410932539	aa	PREDICTED: histone H3.2-like [Takifugu rubripes]	3	10	1.61848e+07	11.3768	223.783	40.19	12.7329	10.5356
63085050	est	CR943685 Rainbow trout liver SSH library forward from salinity stress (rtrlbz) Oncorhynchus mykiss cDNA clone rtrlbzb01d07 5prim, mRNA sequence	3	10				310.729
90171543	est	BX862649 tcba Oncorhynchus mykiss cDNA clone tcba0011.j.24 5prim, mRNA sequence	3	10				262.554
400364966	aa	cobalamin-binding protein, partial [Oncorhynchus mykiss]	2	9	4.23817e+07	13.7417	415.256	93.5533	45.4911	6.16357
291190538	aa	Extracellular matrix protein 1 precursor [Salmo salar]	2	9	3.13464e+07	5.48929	334.727	117.538	59.9154	8.36768
323650254	aa	histone h2a.x [Perca flavescens]	2	9	3.08344e+07		512.226	136.227	12.382	11.2095
432957860	aa	PREDICTED: receptor-type tyrosine-protein phosphatase F-like, partial [Oryzias latipes]	2	9	2.62651e+07	12.7855	384.906	135.22	52.277	5.09717
11613556	aa	complement component C3-3 [Oncorhynchus mykiss]	2	9	1.27308e+07	11.1037	405.878	78.3033	180.6	6.75635
24592915	est	678914 NCCCWA 1RT Oncorhynchus mykiss cDNA clone 1RT92B05_B_A03 5', mRNA sequence	3	9				234.467
45318861	est	SGP161142 Atlantic salmon Liver cDNA library Salmo salar cDNA clone L4-0758 5', mRNA sequence	2	9				64.143
90061380	est	BX879209 tcbk Oncorhynchus mykiss cDNA clone tcbk0040.b.04 5prim, mRNA sequence	2	9				164.977
115290715	est	AM402867 Salmo salar liver Parr Salmo salar cDNA clone liv_ali_L5H9, mRNA sequence	4	9				220.123
125611387	est	EST_otsh_rgd_2318 otshrgd mixed_tissue Oncorhynchus tshawytscha cDNA Oncorhynchus tshawytscha cDNA clone otsh_rgd_004_309_rev 5', mRNA sequence	2	9				350.376
189221855	est	okis_FCE_L3-11.G07 Coho salmon ZAP Express ovarian library Oncorhynchus kisutch cDNA, mRNA sequence	5	9				189.028
213129487	est	EST_omyk_evo_820552 omykevo WBC Oncorhynchus mykiss cDNA Oncorhynchus mykiss cDNA clone omyk_evo_506_136 3', mRNA sequence	3	9				331.192
223559806	est	EST_ssal_rgg_1027126 ssalrgg mixed_tissue full-length Salmo salar cDNA Salmo salar cDNA clone ssal_rgg_502_214 5', mRNA sequence	2	9				425.434
511514504	aa	keratin, partial [Clarias batrachus]	2	8	3.65293e+07	10.1991	129.553	70.0226	41.661	4.86865
348504232	aa	PREDICTED: hypothetical protein LOC100698729 [Oreochromis niloticus]	2	8	2.18844e+07	5.1879	348.085	60.32	156.234	4.91943
40541793	est	EST00977 Atlantic salmon Lambda Zap Express ovary cDNA library Salmo salar cDNA clone oyr_008_c10 5' similar to Alpha-2-microglubulin-1, BAA85038, mRNA sequence	2	8				62.2654
114216295	est	CR370813 AGENAE Rainbow trout normalized testis library (tcbi) Oncorhynchus mykiss cDNA clone tcbi0021.l.15 5', mRNA sequence	3	8				280.768
224613258	aa	Myeloperoxidase precursor [Salmo salar]	2	7	8.85556e+06	8.68138	313.685	84.339	69.4459	7.60596
24590954	est	676519 NCCCWA 1RT Oncorhynchus mykiss cDNA clone 1RT90A16_C_A08 5', mRNA sequence	2	7				117.998
24691898	est	649539 NCCCWA 1RT Oncorhynchus mykiss cDNA clone 1RT17M10_C_G05 5', mRNA sequence	3	7				108.544
57010172	est	1294150 NCCCWA 03RT Oncorhynchus mykiss cDNA clone 03RT131H21 3', mRNA sequence	3	7				71.503
213065578	est	EST_ssal_rgf_840807 ssalrgf mixed_tissue full-length Salmo salar cDNA Salmo salar cDNA clone ssal_rgf_507_327 5', mRNA sequence	4	7				116.282
223572455	est	EST_ssal_rgh_1045952 ssalrgh mixed_tissue full-length Salmo salar cDNA Salmo salar cDNA clone ssal_rgh_503_224 3', mRNA sequence	2	7				115.384
185132754	aa	oocyte protease inhibitor-2 precursor [Oncorhynchus mykiss]	2	6	9.66035e+07	1.58845		56.29	18.3236	7.35693
326664656	aa	PREDICTED: tubulin beta-2 chain-like [Danio rerio]	2	6	1.56063e+07	10.0643	381.599	70.74	46.9506	4.95752
24690006	est	648323 NCCCWA 1RT Oncorhynchus mykiss cDNA clone 1RT16C01_A_B01 5', mRNA sequence	2	6				156.203
77575356	est	14892 EMB Oncorhynchus mykiss cDNA clone 115RT_006A12 5', mRNA sequence	2	6				194.378
111557377	est	CU064091 AGENAE Rainbow trout normalized testis library (tcbi) Oncorhynchus mykiss cDNA clone tcbi0047.c.02 5', mRNA sequence	3	6				192.374
125588811	est	EST_otsh_evc_1962 otshevc mixed_tissue Oncorhynchus tshawytscha cDNA Oncorhynchus tshawytscha cDNA clone otsh_evc_006_138_fwd 3', mRNA sequence	3	6				171.734
265666526	est	111408.FA3.S_G09 Subtractive ovarian libraries from fed and fasted coho salmon (14 wk) Oncorhynchus kisutch cDNA, mRNA sequence	2	6				100.734
336087809	aa	fibrinogen beta chain precursor [Plecoglossus altivelis]	2	5	1.87088e+07	7.49077		27.75	55.4567	6.90283
185136278	aa	antithrombin protein precursor [Salmo salar]	2	5	5.29818e+06	2.61789	130.774	71.8767	51.4384	7.6792
13904680	est	RTL00085 Rainbow Trout Liver Lambda Zap II Vector library Oncorhynchus mykiss cDNA 5' similar to fibrinogen gamma chain precursor, mRNA sequence	2	5				234.894
24665605	est	634844 NCCCWA 1RT Oncorhynchus mykiss cDNA clone 1RT3J23_B_E12 5', mRNA sequence	2	5				130.504
63084948	est	CR943583 Rainbow trout liver SSH library forward from salinity stress (rtrlbz) Oncorhynchus mykiss cDNA clone rtrlbzb02g02 5prim, mRNA sequence	3	5				236.866
112256158	est	CU070677 AGENAE Rainbow trout multi-tissues library (tcce) Oncorhynchus mykiss cDNA clone tcad0007.n.03 3', mRNA sequence	3	5				161.244
113955737	est	AM397601 Salmo salar liver parr / smolt Salmo salar cDNA clone liv_stb_B4F08, mRNA sequence	3	5				55.0287
126019996	est	BX861128 tcba Oncorhynchus mykiss cDNA clone tcba0018.d.05 5prim, mRNA sequence	2	5				89.693
151521777	est	EST_oner_rge_730415 onerrge mixed_tissue Oncorhynchus nerka cDNA Oncorhynchus nerka cDNA clone oner_rge_507_335_rev 5', mRNA sequence	3	5				94.1141
223559237	est	EST_ssal_rgg_1026541 ssalrgg mixed_tissue full-length Salmo salar cDNA Salmo salar cDNA clone ssal_rgg_503_013 3', mRNA sequence	3	5				121.029
265666119	est	111408.FE1.S_G11 Subtractive ovarian libraries from fed and fasted coho salmon (14 wk) Oncorhynchus kisutch cDNA, mRNA sequence	3	5				74.798
526253032	aa	trout C-polysaccharide binding protein 2 precursor [Oncorhynchus mykiss]	2	4	1.12112e+07	3.86625	144.652	61.52	25.39	5.63037
29296504	est	otshchmh001035 Oncorhynchus tshawytscha mixed_tissue Oncorhynchus tshawytscha cDNA, mRNA sequence	2	4				204.623
90067972	est	BX879818 tcbk Oncorhynchus mykiss cDNA clone tcbk0058.e.12 5prim, mRNA sequence	2	4				71.063
90166253	est	BX083712 AGENAE Rainbow trout normalized multi-tissues library (tcac) Oncorhynchus mykiss cDNA clone tcac0004.e.11 5prim, mRNA sequence	3	4				104.069
90168879	est	BX872290 tcbk Oncorhynchus mykiss cDNA clone tcbk0008.j.23 5prim, mRNA sequence	2	4				149.513
111554256	est	CU067959 AGENAE Rainbow trout multi-tissues library (tcce) Oncorhynchus mykiss cDNA clone tcce0008.n.24 3', mRNA sequence	3	4				66.7567
11095755	aa	cysteine proteinase [Oncorhynchus mykiss]	2	3	2.85745e+07		275.205	39.23	13.1742	4.80518
45319290	est	SGP161583 Atlantic salmon Liver cDNA library Salmo salar cDNA clone L4-1268 5', mRNA sequence	2	3				51.341
60383416	est	1327202 NCCCWA 09RT Oncorhynchus mykiss cDNA clone 09RT02B11 3', mRNA sequence	2	3				85.4273
89764671	est	EST_ssal_plnb_4284 ssalplnb mixed_tissue Salmo salar cDNA Salmo salar cDNA clone ssal_plnb_024_047_rev 5', mRNA sequence	2	3				84.4487
90049598	est	BX078542 AGENAE Rainbow trout normalized multi-tissues library (tcad) Oncorhynchus mykiss cDNA clone tcad0006.k.16 5prim, mRNA sequence	2	3				118.651
113717329	est	BX863898 tcba Oncorhynchus mykiss cDNA clone tcba0017.c.14 5prim, mRNA sequence	2	3				115.815
125611332	est	EST_otsh_rgd_2263 otshrgd mixed_tissue Oncorhynchus tshawytscha cDNA Oncorhynchus tshawytscha cDNA clone otsh_rgd_004_276_rev 5', mRNA sequence	2	3				95.8187
24709983	est	665181 NCCCWA 1RT Oncorhynchus mykiss cDNA clone 1RT137N12_D_G06 5', mRNA sequence	2	2				39.88
90093969	est	BX865042 tcba Oncorhynchus mykiss cDNA clone tcba0025.m.05 5prim, mRNA sequence	2	2				43.23
125568187	est	EST_otsh_evc_683 otshevc mixed_tissue Oncorhynchus tshawytscha cDNA Oncorhynchus tshawytscha cDNA clone otsh_evc_004_097_fwd 3', mRNA sequence	2	2				44.88
126018559	est	BX305036 tcay Oncorhynchus mykiss cDNA clone tcay0013.c.16 5prim, mRNA sequence	2	2				99.781
