# Supplementary material for: Proteomic Analysis of Chinook Salmon (Oncorhynchus tshawytscha) Ovarian Fluid
Source: PLoS One. 2014 Aug 4;9(8):e104155. doi: 10.1371/journal.pone.0104155 (PMC4121310; doi:10.1371/journal.pone.0104155)
Supplement: Table S2 — Significant protein identifications for bands 1 and 2 excised from 1D SDS-PAGE gel (see Figure 1B ). Accession number (Accession) and description (protein group) from the Teleostei amino acid sequence database (Db: aa) or the est sequence database (Db: est). (XLSX) [file pone.0104155.s002.xlsx]

## Sheet: Sheet1
Table S2: Significant protein identifications for bands 1 and 2 excised from 1D SDS-PAGE gel (see Figure 1B). Accession number (Accession) and description (protein group) from the Teleostei amino acid sequence database (Db: aa) or the est sequence database (Db: est).
Band	~ Size (kDa)	Accession	Db	Protein group
1	10	11095799, 162949438	aa	prostaglandine D synthase [Oncorhynchus mykiss], prostaglandine D synthase [Oncorhynchus masou formosanus]
		209735438, 209738052, 303667728	aa	Lipocalin precursor [Salmo salar]
		47118108	aa	vitellogenin 1, partial [Salvelinus alpinus]
		60385657	est	1329856 NCCCWA 09RT Oncorhynchus mykiss cDNA clone 09RT05I18 3', mRNA sequence
2	18-20	29296179	est	otshchml004066 Oncorhynchus tshawytscha mixed_tissue Oncorhynchus tshawytscha cDNA, mRNA sequence
